# Supplementary material for: Omega-Class Glutathione Transferases Protect DNA from Oxidative Stress in Pathogenic Helminth Reproductive Cells
Source: MDPI journal article supplement (doi:10.3390/antiox12030560), 2023-02-23
Supplement: s1 [file s1]

**Supplementary Table S1. Primers used for expression of recombinant proteins and qRT-PCR**

| Experiments                        | Gene name          | Sequence (5'→3')                    |
|------------------------------------|--------------------|-------------------------------------|
| Expression of recombinant proteins | CsGSTO1-forward    | ATGCCAACCTGTTCCAAGCATTTGCGACAAGGAGA |
|                                    | CsGSTO1-reverse    | TTACATGTCCCAGTCAGGATGACCACTTCGTATGG |
|                                    | CsGSTO2-forward    | ATGTGCTATCTGGGAGACGCAGGGACAGTGTCACG |
|                                    | CsGSTO2-reverse    | CTAGGCAATTTCAAGATTTGGCTTTCCAGCTTTCC |
|                                    | CsGSTS1-forward    | GGGGTCGACAGAGGATGATATTGCATGCAAA     |
|                                    | CsGSTS1-reverse    | TAAGCGGCCGCTTACAGGGGCGTTTCTGGTC     |
|                                    | CsGSTM2-forward    | AAAGTCGACAGCTGGAGTACGTCGGTGACAG     |
|                                    | CsGSTM2-reverse    | TAAGCGGCCGCTTATTTCTGGAGGAGCATCGC    |
| qRT-PCR                            | CsGSTO1-forward    | GTTTCCATTTGTGGAC                    |
|                                    | CsGSTO1-reverse    | TGGTAGCTGCAATACG                    |
|                                    | CsGSTO2-forward    | TCGTTTGAGCGAATCG                    |
|                                    | CsGSTO2-reverse    | CAGCGAGACTGAGTTG                    |
|                                    | CsGSTS1-forward    | TGATATTGCATGCAAACGGTG               |
|                                    | CsGSTS1-reverse    | GAATCACCCATCATATGGAAG               |
|                                    | CsGSTM2-forward    | GTTTGTTGCTGGAGTACGTC                |
|                                    | CsGSTM2-reverse    | AGCAATGTAACGTAGAATGGC               |
|                                    | Cs tubulin-forward | ATTCAGCTGTCCTGGGAAAC                |
|                                    | Cs tubulin-reverse | ACTGCATTGATAACGAAGCG                |

## Legends for supplementary figures

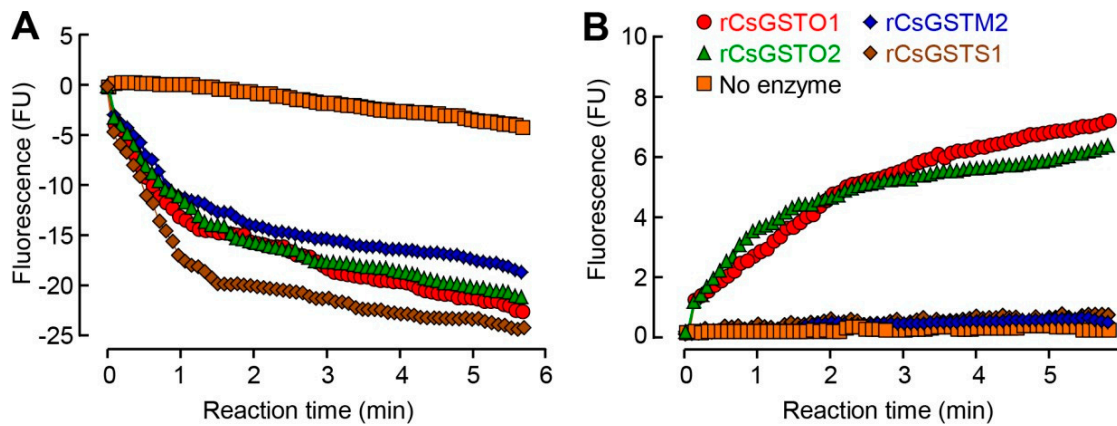

**Supplementary Figure S1. CsGSTO1 and 2 catalyze both glutathionylation and deglutathionylation.** rCsGSTO1 and rCsGSTO2 show both glutathionylation (**A**) and deglutathionylation (**B**), while rCsGSTM2 and rCsGSTS1 catalyze only glutathionylation against peptide substrates. Glutathionylation and deglutathionylation were monitored by tryptophan quenching assay. Figures are representatives for three independent assays.

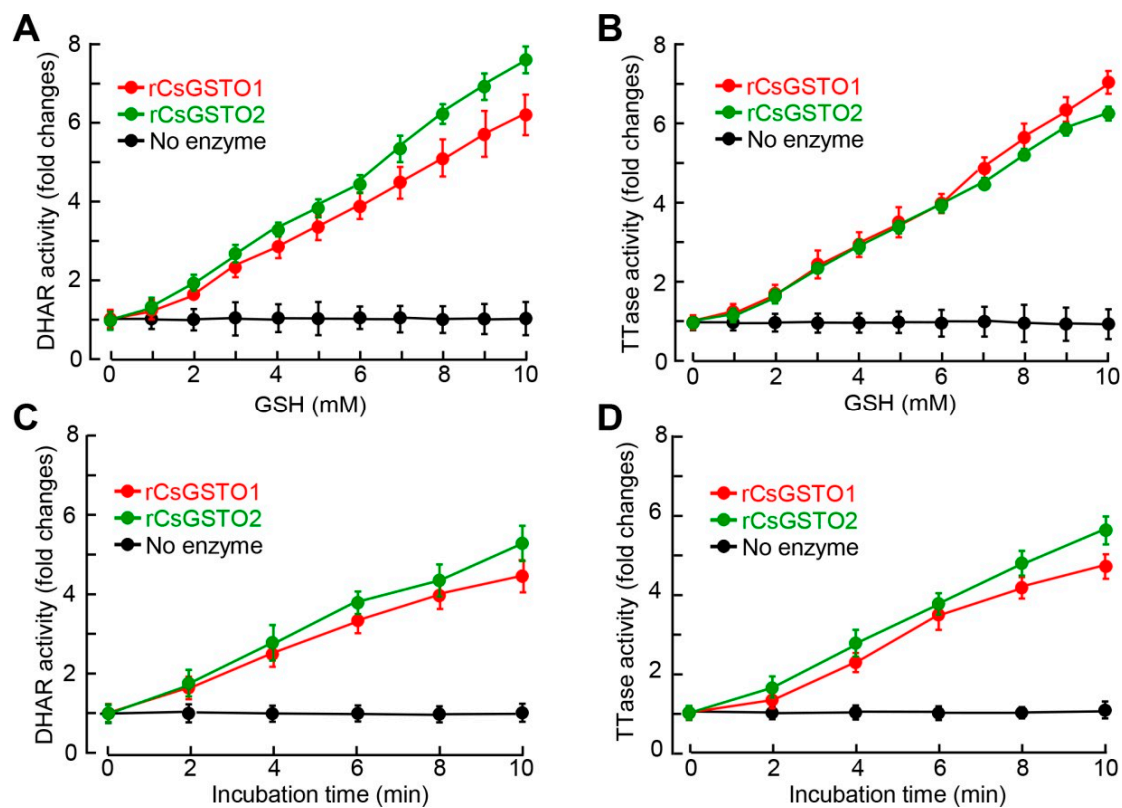

**Supplementary Figure S2. Changes in rCsGSTO activities by varying GSH/GSSG molar ratio.** Treatment with varying doses of GSH (0–10 mM) revised DHAR (A) and TTase activities (B) of rCsGSTO1 and 2. Time-dependent augmentation of DHAR (C) and TTase activities (D) of rCsGSTO1 and 2 by fixed concentration of GSH (4 mM). Error bars represent SEM ( $n = 4$ ).

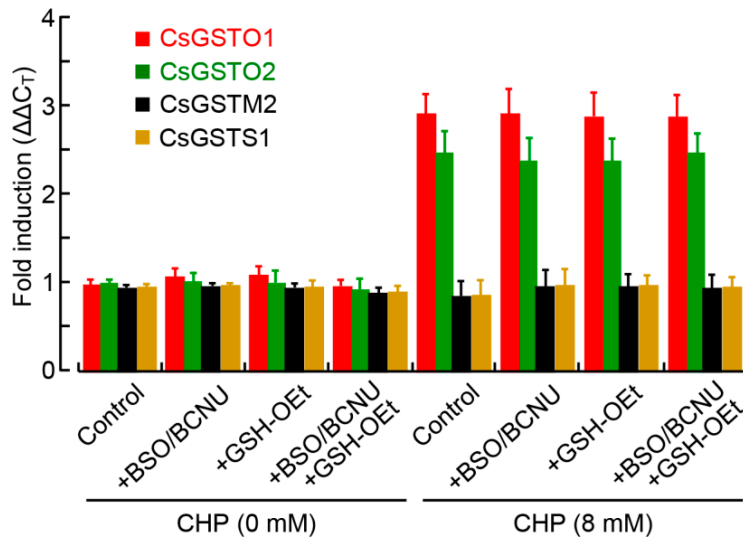

**Supplementary Figure S3. Transcriptional changes of CsGSTO1, CsGSTO2, CsGSTM2, and CsGSTS1 in the presence or absence of oxidative stress.** qRT-PCR shows that treatment with 8 mM CHP for 1 h in live flukes deficient in GSH by BSO + BCNU treatment (200  $\mu$ M each), replenishment of excess GSH by GSH-OEt (2 mM), and restoring GSH after depletion did not affect the transcription levels of CsGSTs. Error bars represent SEM ( $n = 3$ ).

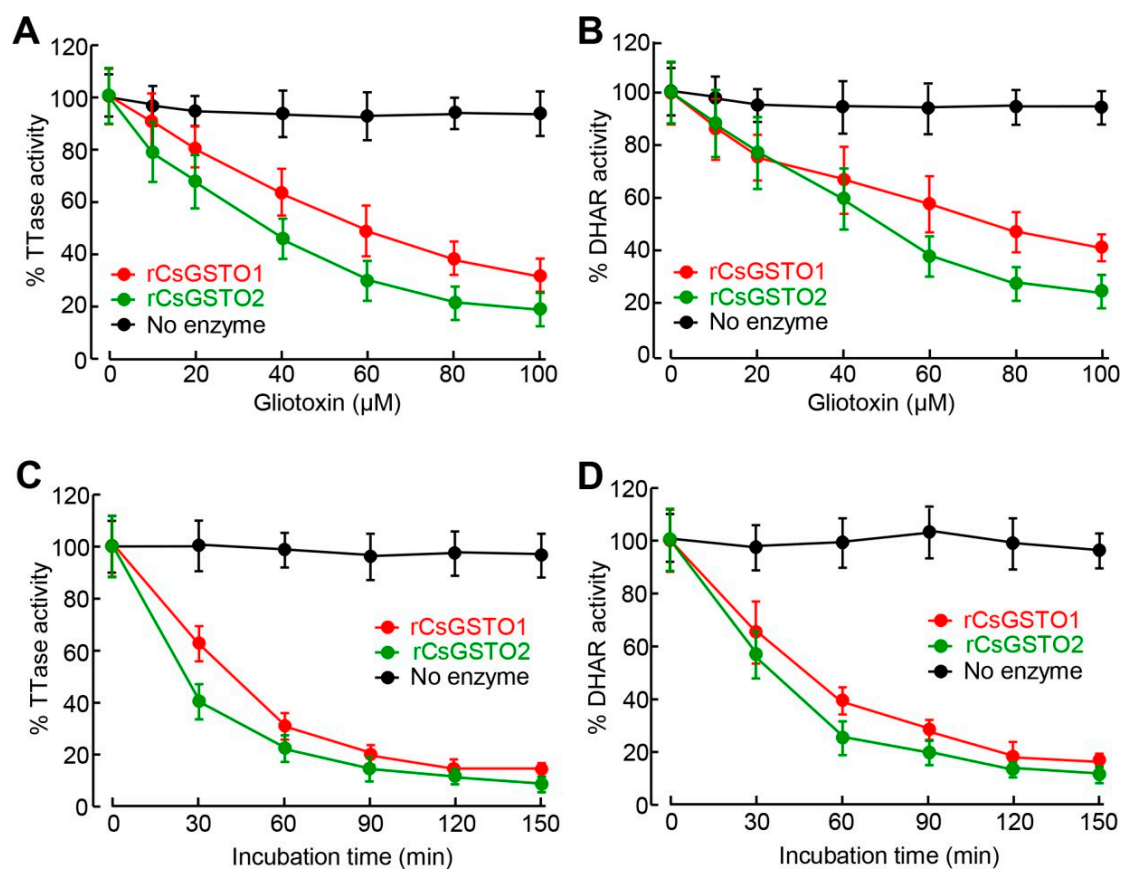

**Supplementary Figure S4. Gliotoxin inhibits rCsGSTO activities in a dose- and time-dependent manner.** (A and B) Changes in GSH-dependent TTase (A) and DHAR activities (B) upon treatment with different doses of gliotoxin (0–100  $\mu\text{M}$ ) for 1 h. Each value is the mean of three independent experiments with six internal replicates. Error bars represent SEM. (C and D) Time-dependent changes of TTase (C) and DHAR activities (D) by 100  $\mu\text{M}$  gliotoxin. Each value is the mean of three independent experiments with six internal repeats. Error bars represent SEM.

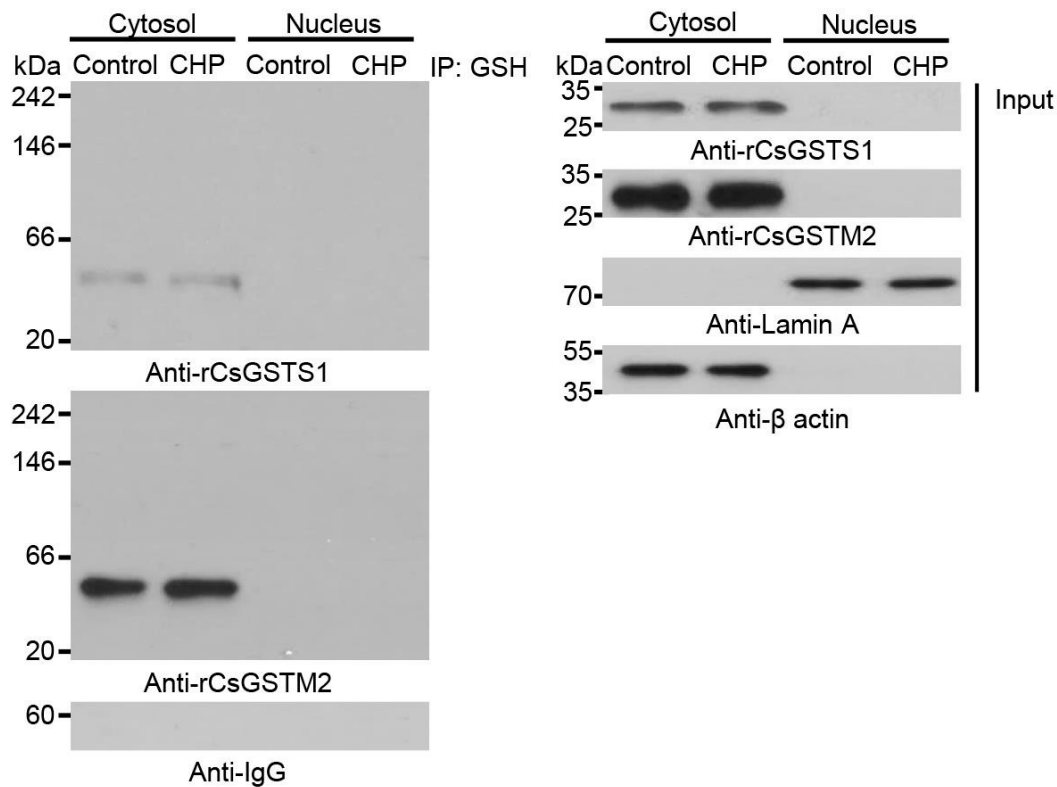

**Supplementary Figure S5. Nuclear import of CsGSTM2 and CsGSTS1 following oxidative stress.** CsGSTM2 and CsGSTS1 were immunologically precipitated with GSH, separated by 4%–20% non-reducing SDS-PAGE and probed with anti-rCsGSTM2 and anti-rCsGSTS1 antibodies. Proteins for nuclear (Lamin A) and cytosolic ( $\beta$ -actin) markers were separated by 12% reducing SDS-PAGE and probed with antibodies specific to respective proteins. Images are representative of three independent experiments.
